# Supplementary material
Source: Springer Nature journal article supplement (https://www.springermedizin.de/resource/supplementary/12889_2011_3995_MOESM1_ESM.pdf/9491200)
Supplement: MOESM1 [file 9491200]

**Randomization**

```
graph TD; A[Randomization] --> B["Experimental Group  
Phase I Intervention  
Phase II Intervention  
Follow-up"]; A --> C["Wait-Listed Control Group  
Usual Care"]; C --> D["At Completion of the Study  
Wait-Listed Control Group is  
Offered the  
Phase I Intervention"];
```

**Experimental Group**  
**Phase I Intervention**  
**Phase II Intervention**  
**Follow-up**

**Wait-Listed Control Group**  
**Usual Care**

**At Completion of the Study**  
**Wait-Listed Control Group is**  
**Offered the**  
**Phase I Intervention**
